# Supplementary material for: Stepwise fractionation extracted lignin for high strength lignin-based carbon fibers
Source: Royal Society of Chemistry journal article supplement (doi:10.1039/c9nj04942h), 2019-01-01
Supplement: c9nj04942h1.pdf [file c9nj04942h1.pdf]

# Supporting Information

## Stepwise fractionation extracted lignin for high strength lignin-based carbon fibers

Xiaojuan Shi<sup>a,\*</sup>, Zhong Dai<sup>b</sup>, Qiping Cao<sup>a</sup>, Kefu Chen<sup>c</sup>, Jinghui Zhou<sup>a,\*</sup>

<sup>a</sup>Liaoning Key Laboratory of Pulp and Paper Engineering, Dalian Polytechnic University, Dalian  
116034, China

<sup>b</sup> State Key Laboratory of Pulp and Papermaking Engineering, South China University of Technology,  
Guangzhou, 510640, China

\*Corresponding authors, Tel.: +86 411 86322929.

E-mail address: 15308220001003@xy.dlpu.edu.cn (Xiaojuan Shi) zhoujh@dlpu.edu.cn (Jinghui Zhou)

Mailing address: School of Light industry and Chemical Engineering, Dalian Polytechnic University, 1#  
Qinggongyuan, Dalian, China, 116034

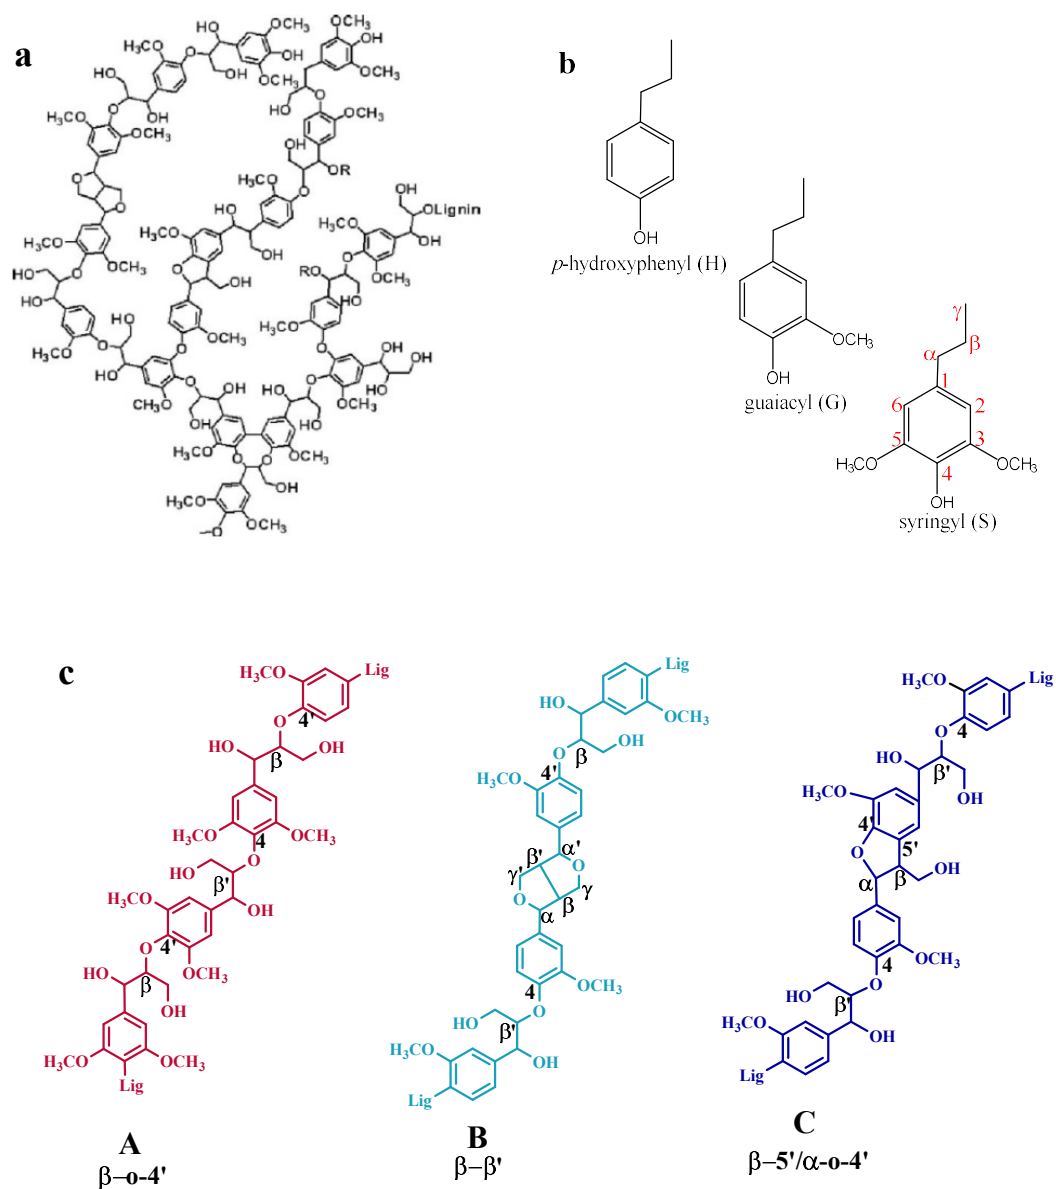

**Fig.S1** (a) A example of lignin structure; (b) Structural units of lignin; (c) display linear structure in lignin macromolecule

**Table S1** Molecular weight and PDI of lignin samples

| Lignin samples | M <sub>n</sub><br>(g/mol) | M <sub>w</sub><br>(g/mol) | PDI  |
|----------------|---------------------------|---------------------------|------|
| AL             | 2779                      | 6768                      | 2.44 |
| 1-step lignin  | 1593                      | 3530                      | 2.22 |
| 2-step lignin  | 2002                      | 4777                      | 2.39 |
| FAL            | 3575                      | 6966                      | 1.95 |

▲ XRD data analysis was based on the following Bragg Equation and Scherrer Equation:

$$d_{002}(\text{nm}) = \frac{\lambda}{2\sin\theta} \quad (\text{Equation S1})$$

$$L_c(\text{nm}) = \frac{k\lambda}{\beta_{002} \cos \theta} \quad (\text{Equation S2})$$

Where  $d_{002}$  is distance between two crystalline lattices,  $\theta$  is the Bragg angle,  $\lambda$  is wavelength of X-ray (0.1540598nm),  $L_c$  is graphite microcrystalline stacking thickness,  $k$  is the shape factor (set as 0.94),  $\beta_{002}$  is the full width at half maximum of diffraction peak (in radian).

**Table S2** Assignments of  $^{13}\text{C}$ - $^1\text{H}$  cross-signals in 2D-HSQC spectra of lignin

| Lable                          | $\delta_{\text{C}}/\delta_{\text{H}}(\text{ppm})$ | Assignments                                                                    |
|--------------------------------|---------------------------------------------------|--------------------------------------------------------------------------------|
| $\text{C}_{\beta}$             | 53.7/3.47                                         | $\text{C}_{\beta}\text{--H}_{\beta}$ in phenylcoumaran (C)                     |
| $\text{B}_{\beta}$             | 55.0/3.10                                         | $\text{C}_{\beta}\text{--H}_{\beta}$ in $\beta$ - $\beta$ (resinol) (B)        |
| $\text{-OCH}_3$                | 56.0/3.72                                         | C-H in methoxyls                                                               |
| $\text{I}_{\gamma}$            | 60.2/4.03                                         | $\text{C}_{\gamma}\text{--H}_{\gamma}$ in cinnamyl alcohol end-groups (I)      |
| $\text{A}_{\gamma}$            | 60.3/3.55                                         | $\text{C}_{\gamma}\text{--H}_{\gamma}$ in $\beta$ -O-4 substructures (A)       |
| $\text{A}'_{\gamma}$           | 63.8/3.93                                         | $\text{C}_{\gamma}\text{--H}_{\gamma}$ in $\gamma$ -acylated $\beta$ -O-4 (A') |
| $\text{C}_{\gamma}$            | 62.9/3.70                                         | $\text{C}_{\gamma}\text{--H}_{\gamma}$ in phenylcoumaran (C)                   |
| $\text{A}_{\alpha}$            | 72.6/4.86                                         | $\text{C}_{\alpha}\text{--H}_{\alpha}$ in $\beta$ -O-4 substructures (A)       |
| $\text{B}'_{\alpha}$           | 83.2/4.98                                         | $\text{C}_{\alpha}\text{--H}_{\alpha}$ in $\beta$ - $\beta$ substructures (B') |
| $\text{A}_{\beta}(\text{G/H})$ | 84.1/4.38                                         | $\text{C}_{\beta}\text{--H}_{\beta}$ in $\beta$ -O-4 linked to G/H (A)         |
| $\text{A}_{\beta}(\text{S})$   | 86.6/4.13                                         | $\text{C}_{\beta}\text{--H}_{\beta}$ in $\beta$ -O-4 linked to S (A)           |
| $\text{C}_{\alpha}$            | 87.2/5.45                                         | $\text{C}_{\alpha}\text{--H}_{\alpha}$ in phenylcoumaran (C)                   |
| $\text{S}_{2,6}$               | 104.4/6.71                                        | $\text{C}_{2,6}\text{--H}_{2,6}$ in syringyl units (S)                         |
| $\text{S}'_{2,6}$              | 105.2/7.31                                        | $\text{C}_{2,6}\text{--H}_{2,6}$ in oxidized S units (S')                      |
| $\text{FA}_2$                  | 111.7/7.26                                        | $\text{C}_2\text{--H}_2$ in ferulate ( <i>p</i> -FA)                           |
| $\text{G}_2$                   | 111.5/6.92                                        | $\text{C}_2\text{--H}_2$ in guaiacyl units (G)                                 |
| $\text{G}_5$                   | 115.6/6.67                                        | $\text{C}_5\text{--H}_5$ in guaiacyl units (G)                                 |
| $\text{G}_6$                   | 119.6/6.74                                        | $\text{C}_6\text{--H}_6$ in guaiacyl units (G)                                 |
| $\text{PCE}_{3,5}$             | 116.0/6.86                                        | $\text{C}_{3,5}\text{--H}_{3,5}$ in <i>p</i> -coumarate (PCE)                  |
| $\text{PCE}_8$                 | 114.3/6.24                                        | $\text{C}_8\text{--H}_8$ in <i>p</i> -coumarate (PCE)                          |
| $\text{FA}_6$                  | 122.9/7.13                                        | $\text{C}_6\text{--H}_6$ in ferulate ( <i>p</i> -FA)                           |
| $\text{H}_{2,6}$               | 128.3/7.11                                        | $\text{C}_{2,6}\text{--H}_{2,6}$ in H units (H)                                |
| $\text{PCE}_{2,6}$             | 130.8/7.44                                        | $\text{C}_{2,6}\text{--H}_{2,6}$ in <i>p</i> -coumarate (PCE)                  |
| $\text{X}_2\text{--X}_5$       | 62-77/3.1-3.6                                     | polysaccharides                                                                |

The relative quantification of  $\beta$ -O-4,  $\beta$ - $\beta$ , or  $\beta$ -5 linkages and S/G ratio were calculated according to following formulas:

$$I(X)\% = \frac{I(X)}{0.5I(S_{2,6}) + I(G_2) + 0.5I(H_{2,6})} \times 100\% \quad (\text{Equation S3})$$

Where  $I(X)$  is the integration of  $\alpha$ -position of A( $\beta$ -O-4), B( $\beta$ - $\beta$ ), or C( $\beta$ -5) linkages, and the integration of  $B_\alpha$  needs to be divided by 2 because there are two  $\alpha$ -positions in B structures.  $I(S_{2,6})$  is the integration of  $S_{2,6}$ , including S and S'.  $I(G_2)$  is the integration of  $G_2$ .  $I(H_{2,6})$  is the integration of  $H_{2,6}$ . The integration should be in the same contour level.

$$S/G = 0.5I(S_{2,6})/I(G_2) \quad (\text{Equation S4})$$

Where  $I(S_{2,6})$  is the integration of  $S_{2,6}$ , and  $I(G_2)$  is the integration of  $G_2$ .
